# Supplementary material for: TMS-Induced Cortical Potentiation during Wakefulness Locally Increases Slow Wave Activity during Sleep
Source: PubMed Central journal article supplement (PMC1803030; doi:10.1371/journal.pone.0000276), 2007-03-07

### 5-Hz rTMS conditioning stimulation paradigm

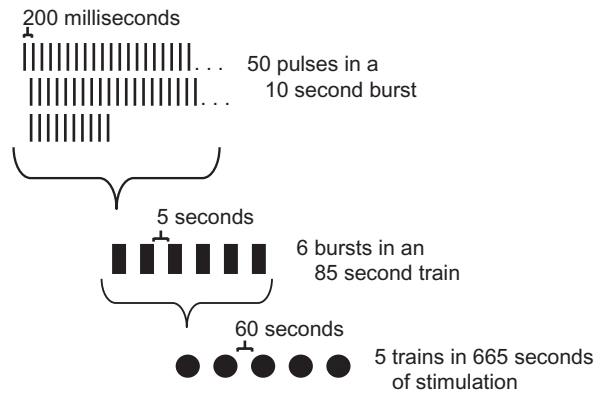

Supplement: pone.0000276.s002.pdf [file pone.0000276.s002.pdf]
